# Supplementary material for: A survey of the availability, prices and affordability of essential medicines in Jiangsu Province, China
Source: PubMed Central journal article supplement (PMC4549946; doi:10.1186/s12913-015-1008-8), 2015-08-27
Supplement: 12913_2015_1008_MOESM1_ESM.pdf [file 12913_2015_1008_MOESM1_ESM.pdf]

**Additional file 1** List of medicines surveyed in five regions in 2013

| Med. No. | Medicine Name  | Medicine Strength | Dosage Form | Pack Size Recommended | Medicine list | EML |
|----------|----------------|-------------------|-------------|-----------------------|---------------|-----|
| 1        | Acetazolamide  | 250mg             | cap/tab     | 100                   | Supplementary | yes |
| 2        | Albendazole    | 200mg             | cap/tab     | 2                     | Core          | yes |
| 3        | Amitriptyline  | 25 mg             | cap/tab     | 100                   | Core          | yes |
| 4        | Amlodipine     | 5mg               | cap/tab     | 30                    | Core          | yes |
| 5        | Amoxicillin    | 500 mg            | cap/tab     | 21                    | Core          | yes |
| 6        | Atenolol       | 50 mg             | cap/tab     | 60                    | Core          | yes |
| 7        | Azathioprine   | 50mg              | cap/tab     | 100                   | Supplementary | yes |
| 8        | Azithromycin   | 250mg             | cap/tab     | 6                     | Supplementary | yes |
| 9        | Bisacodyl      | 5mg               | cap/tab     | 8                     | Supplementary | yes |
| 10       | Captopril      | 25 mg             | cap/tab     | 60                    | Core          | yes |
| 11       | Carbamazepine  | 100mg             | cap/tab     | 100                   | Supplementary | yes |
| 12       | Ceftazidime    | 0.03mg            | disc        |                       | Supplementary | yes |
| 13       | Cefuroxime     | 750mg             | vial        | 1                     | Supplementary | yes |
| 14       | Cephalexin     | 250mg             | cap/tab     | 28                    | Core          | yes |
| 15       | Ciprofloxacin  | 500 mg            | cap/tab     | 10                    | Core          | yes |
| 16       | Clarithromycin | 250mg             | cap/tab     | 12                    | Supplementary | yes |

---

|    |                     |            |         |     |               |     |
|----|---------------------|------------|---------|-----|---------------|-----|
| 17 | Dexamethasone       | 0.1% ophth | drop    | 5   | Supplementary | yes |
| 18 | Diazepam            | 5 mg       | cap/tab | 100 | Core          | yes |
| 19 | Diclofenac          | 50 mg      | cap/tab | 100 | Core          | yes |
| 20 | Digoxin             | 250mg      | cap/tab | 100 | Supplementary | yes |
| 21 | Enalapril           | 10mg       | cap/tab | 30  | Core          | yes |
| 22 | Erythromycin        | 250mg      | cap/tab | 20  | Supplementary | yes |
| 23 | Fluconazole         | 150mg      | cap/tab | 7   | Supplementary | yes |
| 24 | Fluoxetine          | 20mg       | cap/tab | 30  | Core          | yes |
| 25 | Folic Acid          | 1mg        | cap/tab | 31  | Supplementary | yes |
| 26 | Furosemide          | 40mg       | cap/tab | 20  | Supplementary | yes |
| 27 | Glibenclamide       | 5 mg       | cap/tab | 60  | Core          | yes |
| 28 | Gliclazide          | 80mg       | cap/tab | 100 | Core          | yes |
| 29 | Hydrochlorothiazide | 25mg       | cap/tab | 30  | Core          | yes |
| 30 | Hydrocortisone      | 1%         | cream   | 10  | Supplementary | yes |
| 31 | Ibuprofen           | 400mg      | cap/tab | 30  | Core          | yes |
| 32 | Indometacin         | 25mg       | cap/tab | 100 | Supplementary | yes |
| 33 | Insulin             | 100iu/ml   | vial    | 4   | Supplementary | yes |
| 34 | Ketoconazole        | 200mg      | cap/tab | 10  | Supplementary | yes |
| 35 | Levofloxacin        | 250mg      | cap/tab | 21  | Supplementary | yes |

---

|    |                                   |                 |         |     |               |     |
|----|-----------------------------------|-----------------|---------|-----|---------------|-----|
| 36 | Metformin                         | 500mg           | cap/tab | 100 | Core          | yes |
| 37 | Metoclopramide                    | 10mg            | cap/tab | 100 | Supplementary | yes |
| 38 | Metronidazole                     | 200mg           | cap/tab | 28  | Core          | yes |
| 39 | Nifedipine sustained<br>- release | 20mg            | cap     | 30  | Core          | yes |
| 40 | Norfloxacin                       | 400mg           | cap/tab | 20  | Supplementary | yes |
| 41 | Ofloxacin                         | 200mg           | cap/tab | 30  | Supplementary | yes |
| 42 | Omeprazole                        | 20 mg           | cap/tab | 30  | Core          | yes |
| 43 | Pethidine                         | 50mg/ml         | ampoule | 5   | Supplementary | yes |
| 44 | Phenytoin                         | 100mg           | cap/tab | 200 | Supplementary | yes |
| 45 | Promethazine                      | 25mg            | cap/tab | 20  | Supplementary | yes |
| 46 | Ranitidine                        | 150mg           | cap/tab | 60  | Core          | yes |
| 47 | Rifampicin                        | 150mg           | cap/tab | 100 | Supplementary | yes |
| 48 | Salbutamol inhaler                | 100<br>mcg/dose | dose    | 200 | Core          | yes |
| 49 | Simvastatin                       | 20 mg           | cap/tab | 30  | Core          | yes |
| 50 | Tetanus Antitoxin                 | 1500 iu         | ampoule |     | Supplementary | yes |

\*EML, Essential Medicines List

List of the medicines investigated (N=50) from both the core and supplementary lists, including

their names, strengths, dosage forms and pack sizes recommended.
